# Supplementary material for: Travel Medicine Curricula across Canadian Pharmacy Programs and Alignment with Scope of Practice
Source: MDPI journal article supplement (doi:10.3390/pharmacy8020102), 2020-06-15
Supplement: s1 [file s1]

Supplementary Table S1. Travel Medicine Curriculum Survey

Epidemiology.

| Topic                                                                              | Taught in Program                                           | Course Name | Type of Course                                                              | If "Yes" to "Taught in Program"            |                                                                                                             |
|------------------------------------------------------------------------------------|-------------------------------------------------------------|-------------|-----------------------------------------------------------------------------|--------------------------------------------|-------------------------------------------------------------------------------------------------------------|
|                                                                                    |                                                             |             |                                                                             | Teaching Mode(s) SELECT ALL THAT APPLY     | Is student learning evaluated in a summative assessment?                                                    |
| Basic concepts (e.g., morbidity, mortality, incidence, prevalence)                 | <input type="checkbox"/> Yes<br><input type="checkbox"/> No |             | <input type="checkbox"/> Required/Core<br><input type="checkbox"/> Elective | <input type="checkbox"/> In Class/Didactic | <input type="checkbox"/> Yes<br><input type="checkbox"/> No (for information only, or formative assessment) |
|                                                                                    |                                                             |             |                                                                             | <input type="checkbox"/> Self-Study/Online |                                                                                                             |
|                                                                                    |                                                             |             |                                                                             | <input type="checkbox"/> Simulation Labs   |                                                                                                             |
|                                                                                    |                                                             |             |                                                                             | <input type="checkbox"/> Other:            |                                                                                                             |
| Geographic specificity/global distribution of disease and potential health hazards | <input type="checkbox"/> Yes<br><input type="checkbox"/> No |             | <input type="checkbox"/> Required/Core<br><input type="checkbox"/> Elective | <input type="checkbox"/> In Class/Didactic | <input type="checkbox"/> Yes<br><input type="checkbox"/> No (for information only, or formative assessment) |
|                                                                                    |                                                             |             |                                                                             | <input type="checkbox"/> Self-Study/Online |                                                                                                             |
|                                                                                    |                                                             |             |                                                                             | <input type="checkbox"/> Simulation Labs   |                                                                                                             |
|                                                                                    |                                                             |             |                                                                             | <input type="checkbox"/> Other:            |                                                                                                             |
| Estimated total hours of teaching time on <b>epidemiology</b> topics above: _____  |                                                             |             |                                                                             |                                            |                                                                                                             |

**Immunology/Vaccinology.**

| If "Yes" to "Taught in Program"                                                                                                                                                                                                |                                                             |             |                                                                             |                                                                                                                                                                         |  |                                                                                                             |
|--------------------------------------------------------------------------------------------------------------------------------------------------------------------------------------------------------------------------------|-------------------------------------------------------------|-------------|-----------------------------------------------------------------------------|-------------------------------------------------------------------------------------------------------------------------------------------------------------------------|--|-------------------------------------------------------------------------------------------------------------|
| Topic                                                                                                                                                                                                                          | Taught in Program                                           | Course Name | Type of Course                                                              | Teaching Mode(s) SELECT ALL THAT APPLY                                                                                                                                  |  | Is student learning evaluated in a summative assessment?                                                    |
| Basic concepts (e.g., live vs. inactivated vaccine, measurement of immune response)                                                                                                                                            | <input type="checkbox"/> Yes<br><input type="checkbox"/> No |             | <input type="checkbox"/> Required/Core<br><input type="checkbox"/> Elective | <input type="checkbox"/> In Class/Didactic<br><input type="checkbox"/> Self-Study/Online<br><input type="checkbox"/> Simulation Labs<br><input type="checkbox"/> Other: |  | <input type="checkbox"/> Yes<br><input type="checkbox"/> No (for information only, or formative assessment) |
| Handling, storage, and disposal of vaccines and related supplies                                                                                                                                                               | <input type="checkbox"/> Yes<br><input type="checkbox"/> No |             | <input type="checkbox"/> Required/Core<br><input type="checkbox"/> Elective | <input type="checkbox"/> In Class/Didactic<br><input type="checkbox"/> Self-Study/Online<br><input type="checkbox"/> Simulation Labs<br><input type="checkbox"/> Other: |  | <input type="checkbox"/> Yes<br><input type="checkbox"/> No (for information only, or formative assessment) |
| <b>Routine vaccination (disease information, indications/contraindications, routes of administration, dosing regimens, duration of protection, immunogenicity, efficacy, potential adverse reactions and their management)</b> |                                                             |             |                                                                             |                                                                                                                                                                         |  |                                                                                                             |
| Bacille Calmette–Guérin                                                                                                                                                                                                        | <input type="checkbox"/> Yes<br><input type="checkbox"/> No |             | <input type="checkbox"/> Required/Core<br><input type="checkbox"/> Elective | <input type="checkbox"/> In Class/Didactic<br><input type="checkbox"/> Self-Study/Online<br><input type="checkbox"/> Simulation Labs<br><input type="checkbox"/> Other: |  | <input type="checkbox"/> Yes<br><input type="checkbox"/> No (for information only, or formative assessment) |
| Diphtheria, tetanus, pertussis                                                                                                                                                                                                 | <input type="checkbox"/> Yes<br><input type="checkbox"/> No |             | <input type="checkbox"/> Required/Core<br><input type="checkbox"/> Elective | <input type="checkbox"/> In Class/Didactic<br><input type="checkbox"/> Self-Study/Online<br><input type="checkbox"/> Simulation Labs<br><input type="checkbox"/> Other: |  | <input type="checkbox"/> Yes<br><input type="checkbox"/> No (for information only, or formative assessment) |
| Haemophilus influenzae type B                                                                                                                                                                                                  | <input type="checkbox"/> Yes<br><input type="checkbox"/> No |             | <input type="checkbox"/> Required/Core<br><input type="checkbox"/> Elective | <input type="checkbox"/> In Class/Didactic<br><input type="checkbox"/> Self-Study/Online<br><input type="checkbox"/> Simulation Labs<br><input type="checkbox"/> Other: |  | <input type="checkbox"/> Yes<br><input type="checkbox"/> No (for information only, or formative assessment) |
| Influenza                                                                                                                                                                                                                      | <input type="checkbox"/> Yes<br><input type="checkbox"/> No |             | <input type="checkbox"/> Required/Core<br><input type="checkbox"/> Elective | <input type="checkbox"/> In Class/Didactic<br><input type="checkbox"/> Self-Study/Online<br><input type="checkbox"/> Simulation Labs<br><input type="checkbox"/> Other: |  | <input type="checkbox"/> Yes<br><input type="checkbox"/> No (for information only, or formative assessment) |
| Measles, mumps, rubella                                                                                                                                                                                                        | <input type="checkbox"/> Yes<br><input type="checkbox"/> No |             | <input type="checkbox"/> Required/Core<br><input type="checkbox"/> Elective | <input type="checkbox"/> In Class/Didactic<br><input type="checkbox"/> Self-Study/Online<br><input type="checkbox"/> Simulation Labs<br><input type="checkbox"/> Other: |  | <input type="checkbox"/> Yes<br><input type="checkbox"/> No (for information only, or formative assessment) |

|               |                                                             |                                                                             |                                                                                                                                                                         |                                                                                                             |
|---------------|-------------------------------------------------------------|-----------------------------------------------------------------------------|-------------------------------------------------------------------------------------------------------------------------------------------------------------------------|-------------------------------------------------------------------------------------------------------------|
| Meningococcal | <input type="checkbox"/> Yes<br><input type="checkbox"/> No | <input type="checkbox"/> Required/Core<br><input type="checkbox"/> Elective | <input type="checkbox"/> In Class/Didactic<br><input type="checkbox"/> Self-Study/Online<br><input type="checkbox"/> Simulation Labs<br><input type="checkbox"/> Other: | <input type="checkbox"/> Yes<br><input type="checkbox"/> No (for information only, or formative assessment) |
| Poliomyelitis | <input type="checkbox"/> Yes<br><input type="checkbox"/> No | <input type="checkbox"/> Required/Core<br><input type="checkbox"/> Elective | <input type="checkbox"/> In Class/Didactic<br><input type="checkbox"/> Self-Study/Online<br><input type="checkbox"/> Simulation Labs<br><input type="checkbox"/> Other: | <input type="checkbox"/> Yes<br><input type="checkbox"/> No (for information only, or formative assessment) |
| Varicella     | <input type="checkbox"/> Yes<br><input type="checkbox"/> No | <input type="checkbox"/> Required/Core<br><input type="checkbox"/> Elective | <input type="checkbox"/> In Class/Didactic<br><input type="checkbox"/> Self-Study/Online<br><input type="checkbox"/> Simulation Labs<br><input type="checkbox"/> Other: | <input type="checkbox"/> Yes<br><input type="checkbox"/> No (for information only, or formative assessment) |

Estimated total hours of teaching time on **routine vaccinations** above: \_\_\_\_\_

**Non-travel recommended vaccinations (indications/contraindications, routes of administration, dosing regimens, duration of protection, immunogenicity, efficacy, potential adverse reactions and their management):**

|                      |                                                             |                                                                             |                                                                                                                                                                         |                                                                                                             |
|----------------------|-------------------------------------------------------------|-----------------------------------------------------------------------------|-------------------------------------------------------------------------------------------------------------------------------------------------------------------------|-------------------------------------------------------------------------------------------------------------|
| Human papillomavirus | <input type="checkbox"/> Yes<br><input type="checkbox"/> No | <input type="checkbox"/> Required/Core<br><input type="checkbox"/> Elective | <input type="checkbox"/> In Class/Didactic<br><input type="checkbox"/> Self-Study/Online<br><input type="checkbox"/> Simulation Labs<br><input type="checkbox"/> Other: | <input type="checkbox"/> Yes<br><input type="checkbox"/> No (for information only, or formative assessment) |
| Pneumococcal         | <input type="checkbox"/> Yes<br><input type="checkbox"/> No | <input type="checkbox"/> Required/Core<br><input type="checkbox"/> Elective | <input type="checkbox"/> In Class/Didactic<br><input type="checkbox"/> Self-Study/Online<br><input type="checkbox"/> Simulation Labs<br><input type="checkbox"/> Other: | <input type="checkbox"/> Yes<br><input type="checkbox"/> No (for information only, or formative assessment) |
| Tetanus              | <input type="checkbox"/> Yes<br><input type="checkbox"/> No | <input type="checkbox"/> Required/Core<br><input type="checkbox"/> Elective | <input type="checkbox"/> In Class/Didactic<br><input type="checkbox"/> Self-Study/Online<br><input type="checkbox"/> Simulation Labs<br><input type="checkbox"/> Other: | <input type="checkbox"/> Yes<br><input type="checkbox"/> No (for information only, or formative assessment) |
| Zoster               | <input type="checkbox"/> Yes<br><input type="checkbox"/> No | <input type="checkbox"/> Required/Core<br><input type="checkbox"/> Elective | <input type="checkbox"/> In Class/Didactic<br><input type="checkbox"/> Self-Study/Online<br><input type="checkbox"/> Simulation Labs<br><input type="checkbox"/> Other: | <input type="checkbox"/> Yes<br><input type="checkbox"/> No (for information only, or formative assessment) |

Estimated total hours of teaching time on **non-travel recommended vaccinations** above: \_\_\_\_\_

**Travel vaccinations (indications/contraindications, routes of administration, dosing regimens, duration of protection, immunogenicity, efficacy, potential adverse reactions and their management):**

|                          |                                                             |                                                                             |                                                                                                                                                                         |                                                                                                             |
|--------------------------|-------------------------------------------------------------|-----------------------------------------------------------------------------|-------------------------------------------------------------------------------------------------------------------------------------------------------------------------|-------------------------------------------------------------------------------------------------------------|
| Cholera                  | <input type="checkbox"/> Yes<br><input type="checkbox"/> No | <input type="checkbox"/> Required/Core<br><input type="checkbox"/> Elective | <input type="checkbox"/> In Class/Didactic<br><input type="checkbox"/> Self-Study/Online<br><input type="checkbox"/> Simulation Labs<br><input type="checkbox"/> Other: | <input type="checkbox"/> Yes<br><input type="checkbox"/> No (for information only, or formative assessment) |
| Japanese encephalitis    | <input type="checkbox"/> Yes<br><input type="checkbox"/> No | <input type="checkbox"/> Required/Core<br><input type="checkbox"/> Elective | <input type="checkbox"/> In Class/Didactic<br><input type="checkbox"/> Self-Study/Online<br><input type="checkbox"/> Simulation Labs<br><input type="checkbox"/> Other: | <input type="checkbox"/> Yes<br><input type="checkbox"/> No (for information only, or formative assessment) |
| Hepatitis A, hepatitis B | <input type="checkbox"/> Yes<br><input type="checkbox"/> No | <input type="checkbox"/> Required/Core<br><input type="checkbox"/> Elective | <input type="checkbox"/> In Class/Didactic<br><input type="checkbox"/> Self-Study/Online<br><input type="checkbox"/> Simulation Labs<br><input type="checkbox"/> Other: | <input type="checkbox"/> Yes<br><input type="checkbox"/> No (for information only, or formative assessment) |
| Rabies                   | <input type="checkbox"/> Yes<br><input type="checkbox"/> No | <input type="checkbox"/> Required/Core<br><input type="checkbox"/> Elective | <input type="checkbox"/> In Class/Didactic<br><input type="checkbox"/> Self-Study/Online<br><input type="checkbox"/> Simulation Labs<br><input type="checkbox"/> Other: | <input type="checkbox"/> Yes<br><input type="checkbox"/> No (for information only, or formative assessment) |
| Tick-borne encephalitis  | <input type="checkbox"/> Yes<br><input type="checkbox"/> No | <input type="checkbox"/> Required/Core<br><input type="checkbox"/> Elective | <input type="checkbox"/> In Class/Didactic<br><input type="checkbox"/> Self-Study/Online<br><input type="checkbox"/> Simulation Labs<br><input type="checkbox"/> Other: | <input type="checkbox"/> Yes<br><input type="checkbox"/> No (for information only, or formative assessment) |
| Typhoid                  | <input type="checkbox"/> Yes<br><input type="checkbox"/> No | <input type="checkbox"/> Required/Core<br><input type="checkbox"/> Elective | <input type="checkbox"/> In Class/Didactic<br><input type="checkbox"/> Self-Study/Online<br><input type="checkbox"/> Simulation Labs<br><input type="checkbox"/> Other: | <input type="checkbox"/> Yes<br><input type="checkbox"/> No (for information only, or formative assessment) |
| Yellow fever             | <input type="checkbox"/> Yes<br><input type="checkbox"/> No | <input type="checkbox"/> Required/Core<br><input type="checkbox"/> Elective | <input type="checkbox"/> In Class/Didactic<br><input type="checkbox"/> Self-Study/Online<br><input type="checkbox"/> Simulation Labs<br><input type="checkbox"/> Other: | <input type="checkbox"/> Yes<br><input type="checkbox"/> No (for information only, or formative assessment) |

Estimated total hours of teaching time on **travel vaccinations** above: \_\_\_\_\_

**Pre-Travel Assessment/Consultation.**

| If "Yes" to "Taught in Program"                                                                                                        |                                                             |             |                                                                             |                                                                                                                                                                         |                                                                                                             |
|----------------------------------------------------------------------------------------------------------------------------------------|-------------------------------------------------------------|-------------|-----------------------------------------------------------------------------|-------------------------------------------------------------------------------------------------------------------------------------------------------------------------|-------------------------------------------------------------------------------------------------------------|
| Topic                                                                                                                                  | Taught in Program                                           | Course Name | Type of Course                                                              | Teaching Mode(s)<br>SELECT ALL THAT APPLY                                                                                                                               | Is student learning evaluated in a summative assessment?                                                    |
| <b>Patient evaluation</b>                                                                                                              |                                                             |             |                                                                             |                                                                                                                                                                         |                                                                                                             |
| Evaluation of travel itineraries/risk assessment (e.g., pre-existing activities, travel to rural vs. urban areas)                      | <input type="checkbox"/> Yes<br><input type="checkbox"/> No |             | <input type="checkbox"/> Required/Core<br><input type="checkbox"/> Elective | <input type="checkbox"/> In Class/Didactic<br><input type="checkbox"/> Self-Study/Online<br><input type="checkbox"/> Simulation Labs<br><input type="checkbox"/> Other: | <input type="checkbox"/> Yes<br><input type="checkbox"/> No (for information only, or formative assessment) |
| Relevant medical history (e.g., previous vaccinations, allergies, chronic illness, mental health history, and concurrent medications)  | <input type="checkbox"/> Yes<br><input type="checkbox"/> No |             | <input type="checkbox"/> Required/Core<br><input type="checkbox"/> Elective | <input type="checkbox"/> In Class/Didactic<br><input type="checkbox"/> Self-Study/Online<br><input type="checkbox"/> Simulation Labs<br><input type="checkbox"/> Other: | <input type="checkbox"/> Yes<br><input type="checkbox"/> No (for information only, or formative assessment) |
| Estimated total hours of teaching time on <b>patient evaluation</b> topics above: _____                                                |                                                             |             |                                                                             |                                                                                                                                                                         |                                                                                                             |
| <b>Special populations and the unique management issues pertaining to the following populations:</b>                                   |                                                             |             |                                                                             |                                                                                                                                                                         |                                                                                                             |
| Immigrants                                                                                                                             | <input type="checkbox"/> Yes<br><input type="checkbox"/> No |             | <input type="checkbox"/> Required/Core<br><input type="checkbox"/> Elective | <input type="checkbox"/> In Class/Didactic<br><input type="checkbox"/> Self-Study/Online<br><input type="checkbox"/> Simulation Labs<br><input type="checkbox"/> Other: | <input type="checkbox"/> Yes<br><input type="checkbox"/> No (for information only, or formative assessment) |
| Infants and children                                                                                                                   | <input type="checkbox"/> Yes<br><input type="checkbox"/> No |             | <input type="checkbox"/> Required/Core<br><input type="checkbox"/> Elective | <input type="checkbox"/> In Class/Didactic<br><input type="checkbox"/> Self-Study/Online<br><input type="checkbox"/> Simulation Labs<br><input type="checkbox"/> Other: | <input type="checkbox"/> Yes<br><input type="checkbox"/> No (for information only, or formative assessment) |
| Pregnant travellers and nursing mothers                                                                                                | <input type="checkbox"/> Yes<br><input type="checkbox"/> No |             | <input type="checkbox"/> Required/Core<br><input type="checkbox"/> Elective | <input type="checkbox"/> In Class/Didactic<br><input type="checkbox"/> Self-Study/Online<br><input type="checkbox"/> Simulation Labs<br><input type="checkbox"/> Other: | <input type="checkbox"/> Yes<br><input type="checkbox"/> No (for information only, or formative assessment) |
| Travellers with chronic diseases (e.g., diabetes, chronic obstructive pulmonary disease, cardiovascular disease, mental health issues) | <input type="checkbox"/> Yes<br><input type="checkbox"/> No |             | <input type="checkbox"/> Required/Core<br><input type="checkbox"/> Elective | <input type="checkbox"/> In Class/Didactic<br><input type="checkbox"/> Self-Study/Online<br><input type="checkbox"/> Simulation Labs<br><input type="checkbox"/> Other: | <input type="checkbox"/> Yes<br><input type="checkbox"/> No (for information only, or formative assessment) |
| Travellers who are immunocompromised, including AIDS and HIV                                                                           | <input type="checkbox"/> Yes<br><input type="checkbox"/> No |             | <input type="checkbox"/> Required/Core<br><input type="checkbox"/> Elective | <input type="checkbox"/> In Class/Didactic<br><input type="checkbox"/> Self-Study/Online<br><input type="checkbox"/> Simulation Labs                                    | <input type="checkbox"/> Yes<br><input type="checkbox"/> No (for information only, or formative assessment) |

|                                                                          |                                                             |                                                                             |                                                                                                                                                                                                            |                                                                                                             |
|--------------------------------------------------------------------------|-------------------------------------------------------------|-----------------------------------------------------------------------------|------------------------------------------------------------------------------------------------------------------------------------------------------------------------------------------------------------|-------------------------------------------------------------------------------------------------------------|
| VFRs (those visiting friends and relatives in their countries of origin) | <input type="checkbox"/> Yes<br><input type="checkbox"/> No | <input type="checkbox"/> Required/Core<br><input type="checkbox"/> Elective | <input type="checkbox"/> Other:<br><input type="checkbox"/> In Class/Didactic<br><input type="checkbox"/> Self-Study/Online<br><input type="checkbox"/> Simulation Labs<br><input type="checkbox"/> Other: | <input type="checkbox"/> Yes<br><input type="checkbox"/> No (for information only, or formative assessment) |
|--------------------------------------------------------------------------|-------------------------------------------------------------|-----------------------------------------------------------------------------|------------------------------------------------------------------------------------------------------------------------------------------------------------------------------------------------------------|-------------------------------------------------------------------------------------------------------------|

|                                                                                                                                                                                                                                                 |                                                             |                                                                             |                                                                                                                                                                         |                                                                                                             |
|-------------------------------------------------------------------------------------------------------------------------------------------------------------------------------------------------------------------------------------------------|-------------------------------------------------------------|-----------------------------------------------------------------------------|-------------------------------------------------------------------------------------------------------------------------------------------------------------------------|-------------------------------------------------------------------------------------------------------------|
| <b>Others:</b> Athletes, business travellers, elderly travellers, expatriates/long-term travellers, travel for the purpose of international adoption, missionaries/health workers, travellers with disabilities, travel to hostile environments | <input type="checkbox"/> Yes<br><input type="checkbox"/> No | <input type="checkbox"/> Required/Core<br><input type="checkbox"/> Elective | <input type="checkbox"/> In Class/Didactic<br><input type="checkbox"/> Self-Study/Online<br><input type="checkbox"/> Simulation Labs<br><input type="checkbox"/> Other: | <input type="checkbox"/> Yes<br><input type="checkbox"/> No (for information only, or formative assessment) |
|-------------------------------------------------------------------------------------------------------------------------------------------------------------------------------------------------------------------------------------------------|-------------------------------------------------------------|-----------------------------------------------------------------------------|-------------------------------------------------------------------------------------------------------------------------------------------------------------------------|-------------------------------------------------------------------------------------------------------------|

Estimated total hours of teaching time on **special population** topics above: \_\_\_\_\_

**Special itineraries and the unique management issues associated with the following activities/itineraries:**

|                                  |                                                             |                                                                             |                                                                                                                                                                         |                                                                                                             |
|----------------------------------|-------------------------------------------------------------|-----------------------------------------------------------------------------|-------------------------------------------------------------------------------------------------------------------------------------------------------------------------|-------------------------------------------------------------------------------------------------------------|
| Mass gatherings (e.g., the Hajj) | <input type="checkbox"/> Yes<br><input type="checkbox"/> No | <input type="checkbox"/> Required/Core<br><input type="checkbox"/> Elective | <input type="checkbox"/> In Class/Didactic<br><input type="checkbox"/> Self-Study/Online<br><input type="checkbox"/> Simulation Labs<br><input type="checkbox"/> Other: | <input type="checkbox"/> Yes<br><input type="checkbox"/> No (for information only, or formative assessment) |
|----------------------------------|-------------------------------------------------------------|-----------------------------------------------------------------------------|-------------------------------------------------------------------------------------------------------------------------------------------------------------------------|-------------------------------------------------------------------------------------------------------------|

|                                                                                                                                                                                                                                                    |                                                             |                                                                             |                                                                                                                                                                         |                                                                                                             |
|----------------------------------------------------------------------------------------------------------------------------------------------------------------------------------------------------------------------------------------------------|-------------------------------------------------------------|-----------------------------------------------------------------------------|-------------------------------------------------------------------------------------------------------------------------------------------------------------------------|-------------------------------------------------------------------------------------------------------------|
| <b>Others:</b> Armed conflict zones, cruise travel/sailing, diving, extended stay travel, extreme/wilderness travel, last-minute travel, travel to receive medical care, natural disaster areas, sex tourism, areas experiencing disease outbreaks | <input type="checkbox"/> Yes<br><input type="checkbox"/> No | <input type="checkbox"/> Required/Core<br><input type="checkbox"/> Elective | <input type="checkbox"/> In Class/Didactic<br><input type="checkbox"/> Self-Study/Online<br><input type="checkbox"/> Simulation Labs<br><input type="checkbox"/> Other: | <input type="checkbox"/> Yes<br><input type="checkbox"/> No (for information only, or formative assessment) |
|----------------------------------------------------------------------------------------------------------------------------------------------------------------------------------------------------------------------------------------------------|-------------------------------------------------------------|-----------------------------------------------------------------------------|-------------------------------------------------------------------------------------------------------------------------------------------------------------------------|-------------------------------------------------------------------------------------------------------------|

Estimated total hours of teaching time on **special itineraries** topics above: \_\_\_\_\_

**Travel-Related Diseases.**

| If "Yes" to "Taught in Program"                                                                                                                                                                                |                                                             |             |                                                                             |                                                                                                                                                                         |                                                                                                             |  |
|----------------------------------------------------------------------------------------------------------------------------------------------------------------------------------------------------------------|-------------------------------------------------------------|-------------|-----------------------------------------------------------------------------|-------------------------------------------------------------------------------------------------------------------------------------------------------------------------|-------------------------------------------------------------------------------------------------------------|--|
| Topic                                                                                                                                                                                                          | Taught in Program                                           | Course Name | Type of Course                                                              | Teaching Mode(s) SELECT ALL THAT APPLY                                                                                                                                  | Is student learning evaluated in a summative assessment?                                                    |  |
| <b>Diseases associated with vectors (including risk, prevention, signs/symptoms, complications, treatment):</b>                                                                                                |                                                             |             |                                                                             |                                                                                                                                                                         |                                                                                                             |  |
| Lyme                                                                                                                                                                                                           | <input type="checkbox"/> Yes<br><input type="checkbox"/> No |             | <input type="checkbox"/> Required/Core<br><input type="checkbox"/> Elective | <input type="checkbox"/> In Class/Didactic<br><input type="checkbox"/> Self-Study/Online<br><input type="checkbox"/> Simulation Labs<br><input type="checkbox"/> Other: | <input type="checkbox"/> Yes<br><input type="checkbox"/> No (for information only, or formative assessment) |  |
| Malaria                                                                                                                                                                                                        | <input type="checkbox"/> Yes<br><input type="checkbox"/> No |             | <input type="checkbox"/> Required/Core<br><input type="checkbox"/> Elective | <input type="checkbox"/> In Class/Didactic<br><input type="checkbox"/> Self-Study/Online<br><input type="checkbox"/> Simulation Labs<br><input type="checkbox"/> Other: | <input type="checkbox"/> Yes<br><input type="checkbox"/> No (for information only, or formative assessment) |  |
| West Nile                                                                                                                                                                                                      | <input type="checkbox"/> Yes<br><input type="checkbox"/> No |             | <input type="checkbox"/> Required/Core<br><input type="checkbox"/> Elective | <input type="checkbox"/> In Class/Didactic<br><input type="checkbox"/> Self-Study/Online<br><input type="checkbox"/> Simulation Labs<br><input type="checkbox"/> Other: | <input type="checkbox"/> Yes<br><input type="checkbox"/> No (for information only, or formative assessment) |  |
| Yellow Fever                                                                                                                                                                                                   | <input type="checkbox"/> Yes<br><input type="checkbox"/> No |             | <input type="checkbox"/> Required/Core<br><input type="checkbox"/> Elective | <input type="checkbox"/> In Class/Didactic<br><input type="checkbox"/> Self-Study/Online<br><input type="checkbox"/> Simulation Labs<br><input type="checkbox"/> Other: | <input type="checkbox"/> Yes<br><input type="checkbox"/> No (for information only, or formative assessment) |  |
| Zika                                                                                                                                                                                                           | <input type="checkbox"/> Yes<br><input type="checkbox"/> No |             | <input type="checkbox"/> Required/Core<br><input type="checkbox"/> Elective | <input type="checkbox"/> In Class/Didactic<br><input type="checkbox"/> Self-Study/Online<br><input type="checkbox"/> Simulation Labs<br><input type="checkbox"/> Other: | <input type="checkbox"/> Yes<br><input type="checkbox"/> No (for information only, or formative assessment) |  |
| <b>Others:</b> African tick-bite fever, chikungunya, dengue, Japanese encephalitis, tick-borne encephalitis, filariasis, hemorrhagic fevers, leishmaniasis, plague, typhus, Rift Valley fever, trypanosomiasis | <input type="checkbox"/> Yes<br><input type="checkbox"/> No |             | <input type="checkbox"/> Required/Core<br><input type="checkbox"/> Elective | <input type="checkbox"/> In Class/Didactic<br><input type="checkbox"/> Self-Study/Online<br><input type="checkbox"/> Simulation Labs<br><input type="checkbox"/> Other: | <input type="checkbox"/> Yes<br><input type="checkbox"/> No (for information only, or formative assessment) |  |
| Personal protective measures against bites                                                                                                                                                                     | <input type="checkbox"/> Yes<br><input type="checkbox"/> No |             | <input type="checkbox"/> Required/Core<br><input type="checkbox"/> Elective | <input type="checkbox"/> In Class/Didactic<br><input type="checkbox"/> Self-Study/Online<br><input type="checkbox"/> Simulation Labs                                    | <input type="checkbox"/> Yes<br><input type="checkbox"/> No (for information only, or formative assessment) |  |

|                                                                                                                                    |                                                             |                                                                             |                                                                                                                                                                               |                                                                                                             |
|------------------------------------------------------------------------------------------------------------------------------------|-------------------------------------------------------------|-----------------------------------------------------------------------------|-------------------------------------------------------------------------------------------------------------------------------------------------------------------------------|-------------------------------------------------------------------------------------------------------------|
| <input type="checkbox"/> Other: _____                                                                                              |                                                             |                                                                             |                                                                                                                                                                               |                                                                                                             |
| Estimated total hours of teaching time on <b>diseases associated with vectors</b> topics above: _____                              |                                                             |                                                                             |                                                                                                                                                                               |                                                                                                             |
| <b>Diseases associated with person-to-person contact (including risk, prevention, signs/symptoms, complications, treatment)</b>    |                                                             |                                                                             |                                                                                                                                                                               |                                                                                                             |
| Sexually transmitted diseases                                                                                                      | <input type="checkbox"/> Yes<br><input type="checkbox"/> No | <input type="checkbox"/> Required/Core<br><input type="checkbox"/> Elective | <input type="checkbox"/> In Class/Didactic<br><input type="checkbox"/> Self-Study/Online<br><input type="checkbox"/> Simulation Labs<br><input type="checkbox"/> Other: _____ | <input type="checkbox"/> Yes<br><input type="checkbox"/> No (for information only, or formative assessment) |
| Tuberculosis                                                                                                                       | <input type="checkbox"/> Yes<br><input type="checkbox"/> No | <input type="checkbox"/> Required/Core<br><input type="checkbox"/> Elective | <input type="checkbox"/> In Class/Didactic<br><input type="checkbox"/> Self-Study/Online<br><input type="checkbox"/> Simulation Labs<br><input type="checkbox"/> Other: _____ | <input type="checkbox"/> Yes<br><input type="checkbox"/> No (for information only, or formative assessment) |
| Estimated total hours of teaching time on <b>diseases associated with person-to-person contact</b> above: _____                    |                                                             |                                                                             |                                                                                                                                                                               |                                                                                                             |
| <b>Diseases associated with ingestion of food and water (including risk, prevention, signs/symptoms, complications, treatment)</b> |                                                             |                                                                             |                                                                                                                                                                               |                                                                                                             |
| Cholera                                                                                                                            | <input type="checkbox"/> Yes<br><input type="checkbox"/> No | <input type="checkbox"/> Required/Core<br><input type="checkbox"/> Elective | <input type="checkbox"/> In Class/Didactic<br><input type="checkbox"/> Self-Study/Online<br><input type="checkbox"/> Simulation Labs<br><input type="checkbox"/> Other: _____ | <input type="checkbox"/> Yes<br><input type="checkbox"/> No (for information only, or formative assessment) |
| Travellers' diarrhea                                                                                                               | <input type="checkbox"/> Yes<br><input type="checkbox"/> No | <input type="checkbox"/> Required/Core<br><input type="checkbox"/> Elective | <input type="checkbox"/> In Class/Didactic<br><input type="checkbox"/> Self-Study/Online<br><input type="checkbox"/> Simulation Labs<br><input type="checkbox"/> Other: _____ | <input type="checkbox"/> Yes<br><input type="checkbox"/> No (for information only, or formative assessment) |
| Typhoid and paratyphoid fever                                                                                                      | <input type="checkbox"/> Yes<br><input type="checkbox"/> No | <input type="checkbox"/> Required/Core<br><input type="checkbox"/> Elective | <input type="checkbox"/> In Class/Didactic<br><input type="checkbox"/> Self-Study/Online<br><input type="checkbox"/> Simulation Labs<br><input type="checkbox"/> Other: _____ | <input type="checkbox"/> Yes<br><input type="checkbox"/> No (for information only, or formative assessment) |
| <b>Others:</b> Amebiasis, brucellosis, cryptosporidiosis, cyclosporiasis, giardiasis, norovirus                                    | <input type="checkbox"/> Yes<br><input type="checkbox"/> No | <input type="checkbox"/> Required/Core<br><input type="checkbox"/> Elective | <input type="checkbox"/> In Class/Didactic<br><input type="checkbox"/> Self-Study/Online<br><input type="checkbox"/> Simulation Labs<br><input type="checkbox"/> Other: _____ | <input type="checkbox"/> Yes<br><input type="checkbox"/> No (for information only, or formative assessment) |
| Food and water precautions                                                                                                         | <input type="checkbox"/> Yes<br><input type="checkbox"/> No | <input type="checkbox"/> Required/Core<br><input type="checkbox"/> Elective | <input type="checkbox"/> In Class/Didactic<br><input type="checkbox"/> Self-Study/Online<br><input type="checkbox"/> Simulation Labs<br><input type="checkbox"/> Other: _____ | <input type="checkbox"/> Yes<br><input type="checkbox"/> No (for information only, or formative assessment) |
| Estimated total hours of teaching time on <b>disease associated with ingestion of food and water</b> topics above: _____           |                                                             |                                                                             |                                                                                                                                                                               |                                                                                                             |



**Diseases associated with bites and stings (including risk, prevention, signs/symptoms, complications, treatment):**

|                                                                                                                                                                           |                                                             |                                                                             |                                                                                                                                                                         |                                                                                                             |
|---------------------------------------------------------------------------------------------------------------------------------------------------------------------------|-------------------------------------------------------------|-----------------------------------------------------------------------------|-------------------------------------------------------------------------------------------------------------------------------------------------------------------------|-------------------------------------------------------------------------------------------------------------|
| Rabies                                                                                                                                                                    | <input type="checkbox"/> Yes<br><input type="checkbox"/> No | <input type="checkbox"/> Required/Core<br><input type="checkbox"/> Elective | <input type="checkbox"/> In Class/Didactic<br><input type="checkbox"/> Self-Study/Online<br><input type="checkbox"/> Simulation Labs<br><input type="checkbox"/> Other: | <input type="checkbox"/> Yes<br><input type="checkbox"/> No (for information only, or formative assessment) |
| <b>Others:</b> Envenomation (e.g., jelly fish, sea urchin, scorpion, snake, spiders), herpes B virus, cutaneous larva migrans, legionella, leptospirosis, schistosomiasis | <input type="checkbox"/> Yes<br><input type="checkbox"/> No | <input type="checkbox"/> Required/Core<br><input type="checkbox"/> Elective | <input type="checkbox"/> In Class/Didactic<br><input type="checkbox"/> Self-Study/Online<br><input type="checkbox"/> Simulation Labs<br><input type="checkbox"/> Other: | <input type="checkbox"/> Yes<br><input type="checkbox"/> No (for information only, or formative assessment) |

Estimated total hours of teaching time on **diseases associated with bites and stings** topics above: \_\_\_\_\_

**Other Clinical Conditions Associated with Travel.**

| Topic               | Taught in Program                                           | Course Name | Type of Course                                                              | If "Yes" to "Taught in Program"                                                                                                                                         |                                                                                                             |
|---------------------|-------------------------------------------------------------|-------------|-----------------------------------------------------------------------------|-------------------------------------------------------------------------------------------------------------------------------------------------------------------------|-------------------------------------------------------------------------------------------------------------|
|                     |                                                             |             |                                                                             | Teaching Mode(s) SELECT ALL THAT APPLY                                                                                                                                  | Is student learning evaluated in a summative assessment?                                                    |
| Barotrauma          | <input type="checkbox"/> Yes<br><input type="checkbox"/> No |             | <input type="checkbox"/> Required/Core<br><input type="checkbox"/> Elective | <input type="checkbox"/> In Class/Didactic<br><input type="checkbox"/> Self-Study/Online<br><input type="checkbox"/> Simulation Labs<br><input type="checkbox"/> Other: | <input type="checkbox"/> Yes<br><input type="checkbox"/> No (for information only, or formative assessment) |
| Jet lag             | <input type="checkbox"/> Yes<br><input type="checkbox"/> No |             | <input type="checkbox"/> Required/Core<br><input type="checkbox"/> Elective | <input type="checkbox"/> In Class/Didactic<br><input type="checkbox"/> Self-Study/Online<br><input type="checkbox"/> Simulation Labs<br><input type="checkbox"/> Other: | <input type="checkbox"/> Yes<br><input type="checkbox"/> No (for information only, or formative assessment) |
| Motion sickness     | <input type="checkbox"/> Yes<br><input type="checkbox"/> No |             | <input type="checkbox"/> Required/Core<br><input type="checkbox"/> Elective | <input type="checkbox"/> In Class/Didactic<br><input type="checkbox"/> Self-Study/Online<br><input type="checkbox"/> Simulation Labs<br><input type="checkbox"/> Other: | <input type="checkbox"/> Yes<br><input type="checkbox"/> No (for information only, or formative assessment) |
| Thrombosis/embolism | <input type="checkbox"/> Yes<br><input type="checkbox"/> No |             | <input type="checkbox"/> Required/Core<br><input type="checkbox"/> Elective | <input type="checkbox"/> In Class/Didactic<br><input type="checkbox"/> Self-Study/Online<br><input type="checkbox"/> Simulation Labs<br><input type="checkbox"/> Other: | <input type="checkbox"/> Yes<br><input type="checkbox"/> No (for information only, or formative assessment) |
| Altitude sickness   | <input type="checkbox"/> Yes<br><input type="checkbox"/> No |             | <input type="checkbox"/> Required/Core<br><input type="checkbox"/> Elective | <input type="checkbox"/> In Class/Didactic<br><input type="checkbox"/> Self-Study/Online<br><input type="checkbox"/> Simulation Labs                                    | <input type="checkbox"/> Yes<br><input type="checkbox"/> No (for information only, or formative assessment) |

|                                                                                                                       |                                                             |  |                                                                             |                                                                                                                                                                         |                                                                                                             |
|-----------------------------------------------------------------------------------------------------------------------|-------------------------------------------------------------|--|-----------------------------------------------------------------------------|-------------------------------------------------------------------------------------------------------------------------------------------------------------------------|-------------------------------------------------------------------------------------------------------------|
|                                                                                                                       |                                                             |  |                                                                             | <input type="checkbox"/> Other:                                                                                                                                         |                                                                                                             |
| Frostbite and hypothermia                                                                                             | <input type="checkbox"/> Yes<br><input type="checkbox"/> No |  | <input type="checkbox"/> Required/Core<br><input type="checkbox"/> Elective | <input type="checkbox"/> In Class/Didactic<br><input type="checkbox"/> Self-Study/Online<br><input type="checkbox"/> Simulation Labs<br><input type="checkbox"/> Other: | <input type="checkbox"/> Yes<br><input type="checkbox"/> No (for information only, or formative assessment) |
| Respiratory distress/failure (associated with humidity, pollution, etc.)                                              | <input type="checkbox"/> Yes<br><input type="checkbox"/> No |  | <input type="checkbox"/> Required/Core<br><input type="checkbox"/> Elective | <input type="checkbox"/> In Class/Didactic<br><input type="checkbox"/> Self-Study/Online<br><input type="checkbox"/> Simulation Labs<br><input type="checkbox"/> Other: | <input type="checkbox"/> Yes<br><input type="checkbox"/> No (for information only, or formative assessment) |
| Sunburn, heat exhaustion, and sun stroke                                                                              | <input type="checkbox"/> Yes<br><input type="checkbox"/> No |  | <input type="checkbox"/> Required/Core<br><input type="checkbox"/> Elective | <input type="checkbox"/> In Class/Didactic<br><input type="checkbox"/> Self-Study/Online<br><input type="checkbox"/> Simulation Labs<br><input type="checkbox"/> Other: | <input type="checkbox"/> Yes<br><input type="checkbox"/> No (for information only, or formative assessment) |
| Estimated total hours of teaching time on <b>other clinical conditions associated with travel</b> topics above: _____ |                                                             |  |                                                                             |                                                                                                                                                                         |                                                                                                             |

**Travel Medicine Information/Resources.**

| Topic                                                                                                      | Taught in Program                                           | Course Name | Type of Course                                                              | If "Yes" to "Taught in Program"                                                                                                                                         |                                                                                                             |
|------------------------------------------------------------------------------------------------------------|-------------------------------------------------------------|-------------|-----------------------------------------------------------------------------|-------------------------------------------------------------------------------------------------------------------------------------------------------------------------|-------------------------------------------------------------------------------------------------------------|
|                                                                                                            |                                                             |             |                                                                             | Teaching Mode(s) SELECT ALL THAT APPLY                                                                                                                                  | Is student learning evaluated in a summative assessment?                                                    |
| Accessing health information for travellers including commercial and proprietary sources                   | <input type="checkbox"/> Yes<br><input type="checkbox"/> No |             | <input type="checkbox"/> Required/Core<br><input type="checkbox"/> Elective | <input type="checkbox"/> In Class/Didactic<br><input type="checkbox"/> Self-Study/Online<br><input type="checkbox"/> Simulation Labs<br><input type="checkbox"/> Other: | <input type="checkbox"/> Yes<br><input type="checkbox"/> No (for information only, or formative assessment) |
| International health regulations                                                                           | <input type="checkbox"/> Yes<br><input type="checkbox"/> No |             | <input type="checkbox"/> Required/Core<br><input type="checkbox"/> Elective | <input type="checkbox"/> In Class/Didactic<br><input type="checkbox"/> Self-Study/Online<br><input type="checkbox"/> Simulation Labs<br><input type="checkbox"/> Other: | <input type="checkbox"/> Yes<br><input type="checkbox"/> No (for information only, or formative assessment) |
| National/regional recommendations, including national/regional differences                                 | <input type="checkbox"/> Yes<br><input type="checkbox"/> No |             | <input type="checkbox"/> Required/Core<br><input type="checkbox"/> Elective | <input type="checkbox"/> In Class/Didactic<br><input type="checkbox"/> Self-Study/Online<br><input type="checkbox"/> Simulation Labs<br><input type="checkbox"/> Other: | <input type="checkbox"/> Yes<br><input type="checkbox"/> No (for information only, or formative assessment) |
| Estimated total hours of teaching time on <b>travel medicine information/resources</b> topics above: _____ |                                                             |             |                                                                             |                                                                                                                                                                         |                                                                                                             |

Supplementary Table S2. Travel Medicine Curriculum Survey Results

Epidemiology.

|                                       | University 1 | University 2    | University 3 | University 4 | University 5 | University 6 | University 7 | University 8 |
|---------------------------------------|--------------|-----------------|--------------|--------------|--------------|--------------|--------------|--------------|
| <b>Basic concepts</b>                 | ✓            | ✓               | ✓            | ✓            | ✓            | ✓            | ✗            | ✓            |
| Course                                | R            | R               | R            | E            | R            | R            |              | R            |
| Teaching mode(s)                      | S            | D, PBL          | D            | D            | S            | D, S         |              | D            |
| Assessment                            | SUM          | SUM             | FORM         | SUM          | SUM          | SUM          |              | SUM          |
| <b>Global distribution of disease</b> | ✓            | ✗               | ✓            | ✓            | ✓            | ✓            | ✗            | ✓            |
| Course                                | R            |                 | R            | E            | R            | R            |              | R            |
| Teaching mode(s)                      | D, S         |                 | D            | D            | S            | D, S         |              | D            |
| Assessment                            | SUM          |                 | FORM         | SUM          | SUM          | SUM          |              | SUM          |
| Teaching time (hours)                 | 0.75         | 10 <sup>†</sup> | 1            | 1            | 1            | 0.5          | 0            | 0.5          |

Immunology/Vaccinology.

|                                                         | University 1 | University 2 | University 3 | University 4 | University 5 | University 6 | University 7 | University 8 |
|---------------------------------------------------------|--------------|--------------|--------------|--------------|--------------|--------------|--------------|--------------|
| <b>Basic concepts and principles</b>                    | ✓            | ✓            | ✓            | ✓            | ✓            | ✓            | ✓            | ✓            |
| Course                                                  | R            | R            | R            | R, E         | R            | R            | R            | R            |
| Teaching mode(s)                                        | S            | D            | D, S         | D            | S            | D, S         | D            | S            |
| Assessment                                              | SUM          | SUM          | SUM          | SUM          | SUM          | SUM          | SUM          | SUM          |
| <b>Handling, storage, disposal of vaccines/supplies</b> | ✓            | ✓            | ✓            | ✓            | ✓            | ✓            | ✗            | ✗            |
| Course                                                  | R            | R            | R            | R            | R            | R            |              |              |
| Teaching mode(s)                                        | S, L         | D, S, L      | D, L         | S            | D, S         | D, S         |              |              |
| Assessment                                              | SUM          | SUM          | SUM          | SUM          | SUM          | SUM          |              |              |

Routine Vaccines.

|                                       | University 1 | University 2 | University 3 | University 4 | University 5 | University 6 | University 7 | University 8 |
|---------------------------------------|--------------|--------------|--------------|--------------|--------------|--------------|--------------|--------------|
| <b>Bacille Calmette–Guérin</b>        | x            | x            | x            | ✓            | x            | ✓            | ✓            | x            |
| Course                                |              |              |              | E            |              | R            | R            |              |
| Teaching mode(s)                      |              |              |              | D            |              | D, S         | D            |              |
| Assessment                            |              |              |              | SUM          |              | SUM          | SUM          |              |
| <b>Diphtheria, tetanus, pertussis</b> | ✓            | ✓            | ✓            | ✓            | ✓            | ✓            | ✓            | ✓            |
| Course                                | R            | R            | R            | R, E         | R            | R            | R            | R            |
| Teaching mode(s)                      | S            | S            | D, C, G      | D            | S            | D, S         | D            | D            |
| Assessment                            | SUM          | FORM         | SUM          | SUM          | SUM          | SUM          | SUM          | SUM          |
| <b>Haemophilus influenzae type B</b>  | ✓            | ✓            | ✓            | ✓            | ✓            | ✓            | ✓            | ✓            |
| Course                                | R            | R            | R            | R, E         | R            | R            | R            | R            |
| Teaching mode(s)                      | S            | D, PBL       | D, C, G      | D            | D, S         | D, S         | D            | D            |
| Assessment                            | SUM          | SUM          | SUM          | SUM          | SUM          | SUM          | SUM          | SUM          |
| <b>Influenza</b>                      | ✓            | ✓            | ✓            | ✓            | ✓            | ✓            | ✓            | ✓            |
| Course                                | R            | R            | R            | R, E         | R            | R            | R            | R            |
| Teaching mode(s)                      | D, S         | D, PBL       | D, C, G      | D, L         | D, S         | D, S         | D            | D            |
| Assessment                            | SUM          | SUM          | SUM          | SUM          | SUM          | SUM          | SUM          | SUM          |
| <b>Measles, mumps, rubella</b>        | ✓            | ✓            | ✓            | ✓            | ✓            | ✓            | ✓            | ✓            |
| Course                                | R            | R            | R            | R, E         | R            | R            | R            | R            |
| Teaching mode(s)                      | S            | S            | D, C, G      | D            | S            | D, S         | D            | D            |
| Assessment                            | SUM          | FORM         | SUM          | MISSING      | SUM          | SUM          | SUM          | SUM          |
| <b>Meningococcal</b>                  | ✓            | ✓            | ✓            | ✓            | ✓            | ✓            | ✓            | ✓            |
| Course                                | R, E         | R            | R            | R, E         | R            | R            | R            | R            |
| Teaching mode(s)                      | S            | D, PBL       | D, C, G      | D            | D, S         | D, S         | D            | D            |
| Assessment                            | SUM, FORM    | SUM          | SUM          | SUM          | SUM          | SUM          | SUM          | SUM          |
| <b>Poliomyelitis</b>                  | ✓            | x            | ✓            | ✓            | x            | ✓            | x            | ✓            |
| Course                                | R            |              | R            | R, E         |              | R            |              | R            |
| Teaching mode(s)                      | D, S         |              | D, C, G      | D            |              | D, S         |              | D            |
| Assessment                            | SUM          |              | SUM          | SUM          |              | SUM          |              | SUM          |
| <b>Varicella</b>                      | ✓            | ✓            | ✓            | ✓            | ✓            | ✓            | ✓            | ✓            |
| Course                                | R            | R            | R            | R, E         | R            | R            | R            | R            |
| Teaching mode(s)                      | S            | S            | D, C, G      | D, L         | D, S         | D, S         | D            | D            |
| Assessment                            | SUM          | FORM         | SUM          | SUM          | SUM          | SUM          | SUM          | SUM          |
| Teaching time (hours)                 | 4            | 6 *          | 2.5          | 4            | 1            | 2.5          | 3            | 1            |

**Recommended Vaccines.**

|                              | University 1 | University 2 | University 3 | University 4 | University 5 | University 6 | University 7 | University 8 |
|------------------------------|--------------|--------------|--------------|--------------|--------------|--------------|--------------|--------------|
| <b>Human papillomavirus</b>  | ✓            | ✓            | ✓            | ✓            | ✓            | ✓            | ✓            | ✓            |
| Course                       | R            | R            | R            | R, E         | R            | R            | R            | R            |
| Teaching mode(s)             | D, S         | D, PBL       | D, C, G      | D, L         | D, S         | D, S         | D            | D            |
| Assessment                   | SUM          | SUM          | SUM          | SUM          | SUM          | SUM          | SUM          | SUM          |
| <b>Pneumococcal</b>          | ✓            | ✓            | ✓            | ✓            | ✓            | ✓            | ✓            | ✓            |
| Course                       | R            | R            | R            | R, E         | R            | R            | R            | R            |
| Teaching mode(s)             | D, S         | D, PBL       | D, C, G      | D, L         | D, S         | D, S         | D            | D            |
| Assessment                   | SUM          | SUM          | SUM          | SUM          | SUM          | SUM          | SUM          | SUM          |
| <b>Tetanus</b>               | ✓            | ✓            | ✓            | ✓            | ✓            | ✓            | ✓            | ✓            |
| Course                       | R            | R            | R            | E            | R            | R            | R            | R            |
| Teaching mode(s)             | S            | S            | D, C, G      | D            | S            | D, S         | MISSING      | D            |
| Assessment                   | SUM          | FORM         | SUM          | SUM          | SUM          | SUM          | MISSING      | SUM          |
| <b>Herpes zoster</b>         | ✓            | ✓            | ✓            | ✓            | ✓            | ✓            | ✓            | ✓            |
| Course                       | R            | R            | R            | R, E         | R            | R            | E            | R            |
| Teaching mode(s)             | S            | D, PBL       | D, C, G      | D, L         | D, S         | D, S         | D            | D            |
| Assessment                   | SUM          | SUM          | SUM          | SUM          | SUM          | SUM          | SUM          | SUM          |
| <b>Teaching time (hours)</b> | 1.5          | 3*           | 2.5          | 1            | 0.5          | 0.5          | 2            | 1            |

**Travel Vaccines.**

|                  | University 1 | University 2 | University 3 | University 4 | University 5 | University 6 | University 7 | University 8 |
|------------------|--------------|--------------|--------------|--------------|--------------|--------------|--------------|--------------|
| <b>Cholera</b>   | ✓            | ×            | ✓            | ✓            | ✓            | ✓            | ×            | ✓            |
| Course           | R, E         |              | R            | R, E         | R            | R            |              | R            |
| Teaching mode(s) | D, S         |              | D, S         | D            | D, S         | D, S         |              | D            |
| Assessment       | SUM, FORM    |              | FORM         | SUM          | SUM          | SUM          |              | SUM          |

|                                |           |     |            |      |      |         |         |     |
|--------------------------------|-----------|-----|------------|------|------|---------|---------|-----|
| <b>Hepatitis (A/B)</b>         | ✓         | ✓   | ✓          | ✓    | ✓    | ✓       | ✓       | ✓   |
| Course                         | R, E      | R   | R          | R, E | R    | R       | R       | R   |
| Teaching mode(s)               | D, S      | D   | D, S, C, G | D    | D, S | D, S    | D       | D   |
| Assessment                     | SUM, FORM | SUM | SUM        | SUM  | SUM  | SUM     | SUM     | SUM |
| <b>Japanese encephalitis</b>   | ✓         | ✗   | ✓          | ✓    | ✗    | ✓       | ✗       | ✓   |
| Course                         | R, E      |     | R          | E    |      | R       |         | R   |
| Teaching mode(s)               | D, S      |     | D, S       | D    |      | D, S    |         | D   |
| Assessment                     | SUM, FORM |     | FORM       | SUM  |      | SUM     |         | SUM |
| <b>Rabies</b>                  | ✓         | ✗   | ✓          | ✓    | ✗    | ✓       | ✗       | ✗   |
| Course                         | R, E      |     | R          | E    |      | R       |         |     |
| Teaching mode(s)               | S         |     | D          | D    |      | D, S    |         |     |
| Assessment                     | SUM, FORM |     | FORM       | SUM  |      | SUM     |         |     |
| <b>Tick-borne encephalitis</b> | ✗         | ✗   | ✗          | ✓    | ✗    | ✗       | ✗       | ✓   |
| Course                         |           |     |            | E    |      |         |         | R   |
| Teaching mode(s)               |           |     |            | D    |      |         |         | D   |
| Assessment                     |           |     |            | SUM  |      | SUM     |         | SUM |
| <b>Typhoid</b>                 | ✓         | ✗   | ✓          | ✓    | ✓    | ✓       | ✗       | ✓   |
| Course                         | R, E      |     | R          | R, E | R    | R       |         | R   |
| Teaching mode(s)               | D, S      |     | D, S       | D    | D, S | D, S    |         | D   |
| Assessment                     | SUM, FORM |     | FORM       | SUM  | SUM  | MISSING |         | SUM |
| <b>Yellow fever</b>            | ✓         | ✗   | ✓          | ✓    | ✓    | ✓       | MISSING | ✓   |
| Course                         | R, E      |     | R          | R, E | R    | R       | MISSING | R   |
| Teaching mode(s)               | S         |     | D, S       | D    | D, S | D, S    | MISSING | D   |
| Assessment                     | SUM       |     | FORM       | SUM  | SUM  | SUM     | MISSING | SUM |
| <b>Teaching time (hours)</b>   | 1         | 1.5 | 2          | 7    | 0.5  | 0.75    | 0.5     | 1   |

**Pre-Travel Consultation.**

|                           | University 1 | University 2 | University 3 | University 4 | University 5 | University 6 | University 7 | University 8 |
|---------------------------|--------------|--------------|--------------|--------------|--------------|--------------|--------------|--------------|
| <b>Patient evaluation</b> | ✓            | ✗            | ✓            | ✓            | ✓            | ✓            | ✗            | ✓            |
| Course                    | R            |              | R            | E            | R            | R            |              | R            |
| Teaching mode(s)          | D, S         |              | D, C         | D            | D            | D, S, L      |              | D            |
| Assessment                | SUM          |              | SUM          | SUM          | SUM          | SUM          |              | SUM          |
| <b>Medical history</b>    | ✓            | ✓            | ✓            | ✓            | ✓            | ✓            | ✗            | ✓            |
| Course                    | R            | R            | R            | E            | R            | R            |              | R            |
| Teaching mode(s)          | D, S         | D            | D, C         | D            | D            | D, S, L      |              | D            |
| Assessment                | SUM          | SUM, FORM    | SUM          | SUM          | SUM          | SUM          |              | SUM          |
| Teaching time (hours)     | 1            | 0.5-1        | 0.5          | 2            | 0.25         | 2.5          | 0            | MISSING      |

**Special Populations.**

|                   | University 1 | University 2 | University 3 | University 4 | University 5 | University 6 | University 7 | University 8 |
|-------------------|--------------|--------------|--------------|--------------|--------------|--------------|--------------|--------------|
| <b>Immigrants</b> | ✗            | ✗            | ✗            | ✓            | ✓            | ✗            | ✗            | ✗            |
| Course            |              |              |              | E            | R            |              |              |              |
| Teaching mode(s)  |              |              |              | D            | S            |              |              |              |
| Assessment        |              |              |              | SUM          | SUM          |              |              |              |
| <b>Children</b>   | ✗            | ✗            | ✗            | ✓            | ✓            | ✓            | ✗            | ✓            |
| Course            |              |              |              | R, E         | R            | R            |              | R            |
| Teaching mode(s)  |              |              |              | D            | S            | D, S         |              | D, L         |
| Assessment        |              |              |              | SUM          | SUM          | SUM          |              | SUM          |
| <b>Pregnancy</b>  | ✓            | ✗            | ✓            | ✓            | ✓            | ✓            | ✗            | ✓            |
| Course            | R            |              | R            | R, E         | R            | R            |              | R            |
| Teaching mode(s)  | S            |              | D, C         | D            | S            | D, S         |              | D            |
| Assessment        | SUM          |              | SUM          | SUM          | SUM          | SUM          |              | SUM          |

|                                       |     |   |      |     |     |      |   |     |
|---------------------------------------|-----|---|------|-----|-----|------|---|-----|
| <b>Chronic disease</b>                | ✓   | ✗ | ✓    | ✓   | ✓   | ✓    | ✗ | ✓   |
| Course                                | R   |   | R    | E   | R   | R    |   | R   |
| Teaching mode(s)                      | S   |   | D, C | D   | S   | D, S |   | D   |
| Assessment                            | SUM |   | SUM  | SUM | SUM | SUM  |   | SUM |
| <b>Immunocompromised</b>              | ✓   | ✗ | ✗    | ✓   | ✓   | ✓    | ✗ | ✗   |
| Course                                | R   |   |      | E   | R   | R    |   |     |
| Teaching mode(s)                      | S   |   |      | D   | S   | D, S |   |     |
| Assessment                            | SUM |   |      | SUM | SUM | SUM  |   |     |
| <b>Visiting friends and relatives</b> | ✓   | ✗ | ✓    | ✓   | ✗   | ✗    | ✗ | ✗   |
| Course                                | R   |   | R    | E   |     |      |   |     |
| Teaching mode(s)                      | D   |   | D    | D   |     |      |   |     |
| Assessment                            | SUM |   | FORM | SUM |     |      |   |     |
| <b>Other</b>                          | ✗   | ✗ | ✗    | ✓   | ✗   | ✓    | ✗ | ✓   |
| Course                                |     |   |      | E   |     | R, E |   | R   |
| Teaching mode(s)                      |     |   |      | D   |     | D, S |   | D   |
| Assessment                            |     |   |      | SUM |     | SUM  |   | SUM |
| Teaching time (hours)                 | 1   | 0 | 0.5  | 6   | 1   | 0.5  | 0 | 1   |

**Special Itineraries.**

|                       | University 1 | University 2 | University 3 | University 4 | University 5 | University 6 | University 7 | University 8 |
|-----------------------|--------------|--------------|--------------|--------------|--------------|--------------|--------------|--------------|
| <b>Hajj</b>           | ✓            | ✗            | ✗            | ✓            | ✗            | ✗            | ✗            | ✗            |
| Course                | R            |              |              | E            |              |              |              |              |
| Teaching mode(s)      | D            |              |              | D            |              |              |              |              |
| Assessment            | SUM          |              |              | SUM          |              |              |              |              |
| <b>Other</b>          | ✗            | ✗            | ✗            | ✓            | ✗            | ✓            | ✗            | ✗            |
| Course                |              |              |              | E            |              | E            |              |              |
| Teaching mode(s)      |              |              |              | D            |              | D, S         |              |              |
| Assessment            |              |              |              | SUM          |              | SUM          |              |              |
| Teaching time (hours) | 0.1          | 0            | 0            | 2            | 0            | 2            | 0            | 0            |



**Diseases associated with vectors (including risk, prevention, signs/symptoms, complications, treatment).**

|                                     | University 1 | University 2 | University 3 | University 4 | University 5 | University 6 | University 7 | University 8 |
|-------------------------------------|--------------|--------------|--------------|--------------|--------------|--------------|--------------|--------------|
| <b>Lyme</b>                         | x            | ✓            | x            | ✓            | ✓            | x            | x            | x            |
| Course                              |              | R            |              | E            | R            |              |              |              |
| Teaching mode(s)                    |              | D            |              | D            | D            |              |              |              |
| Assessment                          |              | SUM          |              | SUM          | SUM          |              |              |              |
| <b>Malaria</b>                      | ✓            | x            | ✓            | ✓            | ✓            | ✓            | x            | ✓            |
| Course                              | R, E         |              | R            | R, E         | R            | R            |              | R            |
| Teaching mode(s)                    | D            |              | D, C         | D, L         | D            | D, S         |              | D            |
| Assessment                          | SUM          |              | SUM          | SUM          | SUM          | SUM          |              | SUM          |
| <b>West Nile</b>                    | x            | x            | x            | ✓            | x            | x            | x            | ✓            |
| Course                              |              |              |              | E            |              |              |              | R            |
| Teaching mode(s)                    |              |              |              | D            |              |              |              | D            |
| Assessment                          |              |              |              | SUM          |              |              |              | SUM          |
| <b>Yellow fever</b>                 | ✓            | x            | ✓            | ✓            | ✓            | x            | x            | x            |
| Course                              | R, E         |              | R            | E            | R            |              |              |              |
| Teaching mode(s)                    | D, S         |              | D            | D            | D            |              |              |              |
| Assessment                          | SUM          |              | FORM         | SUM          | SUM          |              |              |              |
| <b>Zika</b>                         | ✓            | x            | ✓            | ✓            | ✓            | ✓            | x            | x            |
| Course                              | R, E         |              | R            | E            | R            | R            |              |              |
| Teaching mode(s)                    | D            |              | D, C         | D            | D            | L            |              |              |
| Assessment                          | SUM          |              | SUM          | SUM          | SUM          | SUM          |              |              |
| <b>Other</b>                        | ✓            | x            | ✓            | ✓            | x            | x            | x            | x            |
| Course                              | R            |              | R            | E            |              |              |              |              |
| Teaching mode(s)                    | D            |              | D            | D            |              |              |              |              |
| Assessment                          | SUM          |              | FORM         | MISSING      |              |              |              |              |
| <b>Personal protective measures</b> | ✓            | ✓            | ✓            | ✓            | MISSING      | ✓            | ✓            | ✓            |
| Course                              | R, E         | MISSING      | R            | R, E         | MISSING      | R            | R            | R            |
| Teaching mode(s)                    | D, S, L      | MISSING      | D, C         | D, L         | MISSING      | D, S, L      | D            | D            |
| Assessment                          | SUM          | MISSING      | SUM          | SUM          | MISSING      | SUM          | SUM          | SUM          |
| <b>Teaching time (hours)</b>        | 0.75         | 1            | 1.5          | 8            | 0.5          | 2            | 0.5          | 1            |

Diseases associated with person-to-person contact (including risk, prevention, signs/symptoms, complications, treatment).

|                                        | University 1 | University 2 | University 3 | University 4 | University 5 | University 6 | University 7 | University 8 |
|----------------------------------------|--------------|--------------|--------------|--------------|--------------|--------------|--------------|--------------|
| <b>Sexually transmitted infections</b> | ✓            | ✓            | ✓            | ✓            | ✓            | ✓            | ✓            | ✓            |
| Course                                 | R, E         | R            | R            | R, E         | R            | R, E         | R            | R            |
| Teaching mode(s)                       | D, S         | D, PBL       | D, G         | D            | D            | D, S, L      | D            | D            |
| Assessment                             | SUM          | SUM          | SUM          | SUM          | SUM          | SUM          | SUM          | SUM          |
| <b>Tuberculosis</b>                    | ✗            | ✗            | ✓            | ✓            | ✗            | ✓            | MISSING      | ✓            |
| Course                                 |              |              | R            | R, E         |              | R            | MISSING      | R            |
| Teaching mode(s)                       |              |              | D            | D            |              | D, S         | MISSING      | D            |
| Assessment                             |              |              | SUM          | SUM          |              | SUM          | MISSING      | SUM          |
| <b>Teaching time (hours)</b>           | 2            | 7.5*         | 5            | 1            | 0.5          | 10           | 6            | 6            |

Diseases associated with ingestion of food and water (including risk, prevention, signs/symptoms, complications, treatment).

|                                   | University 1 | University 2 | University 3 | University 4 | University 5 | University 6 | University 7 | University 8 |
|-----------------------------------|--------------|--------------|--------------|--------------|--------------|--------------|--------------|--------------|
| <b>Cholera</b>                    | ✓            | ✗            | ✓            | ✓            | ✓            | ✓            | ✗            | ✗            |
| Course                            | R            |              | R            | E            | R            | R            |              |              |
| Teaching mode(s)                  | D            |              | D            | D            | D            | D, S         |              |              |
| Assessment                        | SUM          |              | FORM         | SUM          | SUM          | SUM          |              |              |
| <b>Travellers' diarrhea</b>       | ✓            | ✓            | ✓            | ✓            | ✓            | ✓            | ✓            | ✓            |
| Course                            | R, E         | R            | R            | R, E         | R            | R            | R            | R            |
| Teaching mode(s)                  | D, S         | D, PBL       | D, C         | D, L         | D            | D, S, L      | D            | D            |
| Assessment                        | SUM          | SUM          | MISSING      | SUM          | SUM          | SUM          | SUM          | SUM          |
| <b>Typhoid</b>                    | ✓            | ✗            | ✓            | ✓            | ✓            | ✗            | ✗            | ✗            |
| Course                            | R            |              | R            | R, E         | R            |              |              |              |
| Teaching mode(s)                  | D, S         |              | D            | D            | D            |              |              |              |
| Assessment                        | SUM          |              | FORM         | MISSING      | SUM          |              |              |              |
| <b>Other</b>                      | ✗            | ✗            | ✓            | ✓            | ✓            | ✓            | ✗            | ✗            |
| Course                            |              |              | R            | E            | R            | R            |              |              |
| Teaching mode(s)                  |              |              | D            | D            | D            | D, S         |              |              |
| Assessment                        |              |              | SUM          | SUM          | SUM          | SUM          |              |              |
| <b>Food and water precautions</b> | ✓            | ✓            | ✓            | ✓            | ✓            | ✓            | ✓            | ✓            |

|                       |     |      |      |      |     |         |         |         |
|-----------------------|-----|------|------|------|-----|---------|---------|---------|
| Course                | R   | R    | R    | R, E | R   | R       | R       | MISSING |
| Teaching mode(s)      | S   | D    | D, C | L    | D   | D, S, L | D       | MISSING |
| Assessment            | SUM | SUM  | SUM  | SUM  | SUM | SUM     | SUM     | MISSING |
| Teaching time (hours) | 1   | 1-2* | 1.5  | 3    | 0.5 | 3.5     | MISSING | 1       |

**Diseases associated with bites and stings (including risk, prevention, signs/symptoms, complications, treatment).**

|                       | University 1 | University 2 | University 3 | University 4 | University 5 | University 6 | University 7 | University 8 |
|-----------------------|--------------|--------------|--------------|--------------|--------------|--------------|--------------|--------------|
| <b>Rabies</b>         | ✓            | ✗            | ✓            | ✓            | ✗            | ✓            | ✗            | ✗            |
| Course                | R            |              | R            | E            |              | R            |              |              |
| Teaching mode(s)      | S            |              | D            | D            |              | L            |              |              |
| Assessment            | SUM          |              | SUM          | SUM          |              | SUM          |              |              |
| <b>Other</b>          | ✓            | ✗            | ✗            | ✓            | ✗            | ✗            | ✗            | ✗            |
| Course                | R, E         |              |              | E            |              |              |              |              |
| Teaching mode(s)      | D            |              |              | D            |              |              |              |              |
| Assessment            | SUM          |              |              | SUM          |              |              |              |              |
| Teaching time (hours) | 0.25         | 0            | 0.25         | 3            | 0            | 0.5          | 0            | 0            |

**Other Conditions Associated with Travel.**

|                        | University 1 | University 2 | University 3 | University 4 | University 5 | University 6 | University 7 | University 8 |
|------------------------|--------------|--------------|--------------|--------------|--------------|--------------|--------------|--------------|
| <b>Barotrauma</b>      | ✗            | ✗            | ✗            | ✓            | ✓            | ✗            | ✓            | ✗            |
| Course                 |              |              |              | E            | R            |              | R            |              |
| Teaching mode(s)       |              |              |              | D            | D            |              | D            |              |
| Assessment             |              |              |              | SUM          | SUM          |              | SUM          |              |
| <b>Jet lag</b>         | ✓            | ✗            | ✗            | ✓            | ✗            | ✓            | ✓            | ✗            |
| Course                 | R            |              |              | E            |              | R            | R            |              |
| Teaching mode(s)       | D            |              |              | D, L         |              | L            | D            |              |
| Assessment             | SUM          |              |              | SUM          |              | SUM          | SUM          |              |
| <b>Motion sickness</b> | ✓            | ✓            | ✓            | ✓            | ✓            | ✗            | ✓            | ✓            |
| Course                 | E            | R            | R            | R, E         | R            |              | R            | R            |
| Teaching mode(s)       | S, L         | D            | D            | D, L         | D            |              | D            | D            |
| Assessment             | SUM          | SUM          | SUM          | SUM          | SUM          |              | SUM          | SUM          |

|                                             |      |        |         |      |      |         |         |     |
|---------------------------------------------|------|--------|---------|------|------|---------|---------|-----|
| <b>Embolism/Thrombosis</b>                  | ✓    | ✓      | ✓       | ✓    | ✗    | ✓       | ✓       | ✓   |
| Course                                      | R    | R      | R       | E    |      | R       | R       | R   |
| Teaching mode(s)                            | D    | D, PBL | D       | D    |      | L       | D       | D   |
| Assessment                                  | SUM  | SUM    | SUM     | SUM  |      | SUM     | SUM     | SUM |
| <b>Altitude sickness</b>                    | ✓    | ✗      | ✓       | ✓    | ✗    | ✓       | ✗       | ✓   |
| Course                                      | R, E |        | R       | R, E |      | R       |         | R   |
| Teaching mode(s)                            | D    |        | D       | D, L |      | D, S, L |         | D   |
| Assessment                                  | SUM  |        | FORM    | SUM  |      | SUM     |         | SUM |
| <b>Frostbite and hypothermia</b>            | ✓    | ✗      | ✗       | ✓    | ✗    | ✗       | ✓       | ✗   |
| Course                                      | R    |        |         | E    |      |         | R       |     |
| Teaching mode(s)                            | D    |        |         | D    |      |         | D       |     |
| Assessment                                  | SUM  |        |         | SUM  |      |         | SUM     |     |
| <b>Respiratory distress/failure</b>         | ✗    | ✗      | ✗       | ✓    | ✗    | ✗       | MISSING | ✗   |
| Course                                      |      |        |         | E    |      |         | MISSING |     |
| Teaching mode(s)                            |      |        |         | D    |      |         | MISSING |     |
| Assessment                                  |      |        |         | SUM  |      |         | MISSING |     |
| <b>Sunburn, heat exhaustion, sun stroke</b> | ✓    | ✗      | ✓       | ✓    | ✓    | ✓       | ✓       | ✓   |
| Course                                      | R    |        | R       | E    | R    | R       | MISSING | R   |
| Teaching mode(s)                            | D, S |        | D       | D, L | D, L | D, S    | MISSING | D   |
| Assessment                                  | SUM  |        | MISSING | SUM  | SUM  | SUM     | MISSING | SUM |
| <b>Teaching time (hours)</b>                | 3    | 8.5*   | 2       | 3    | 1    | 3       | 3.5     | 6   |

#### Travel Medicine Information/Resources.

|                                                    | University 1 | University 2 | University 3 | University 4 | University 5 | University 6 | University 7 | University 8 |
|----------------------------------------------------|--------------|--------------|--------------|--------------|--------------|--------------|--------------|--------------|
| <b>Accessing health information for travellers</b> | ✓            | ✓            | ✓            | ✓            | ✗            | ✓            | ✗            | ✓            |
| Course                                             | R, E         | R            | R            | E            |              | R            |              | R            |
| Teaching mode(s)                                   | D, S         | D, S         | D, G         | D            |              | D, S         |              | D            |
| Assessment                                         | SUM          | FORM         | FORM         | SUM          |              | SUM          |              | SUM          |
| <b>International health regulations</b>            | ✓            | ✗            | ✗            | ✓            | ✗            | ✓            | ✗            | ✓            |
| Course                                             | R            |              |              | E            |              | E            |              | R            |
| Teaching mode(s)                                   | D            |              |              | D            |              | D, S         |              | D            |
| Assessment                                         | SUM          |              |              | SUM          |              | SUM          |              | SUM          |

|                                          |      |      |      |     |   |     |   |     |
|------------------------------------------|------|------|------|-----|---|-----|---|-----|
| <b>National/regional recommendations</b> | ✓    | ✓    | ✓    | ✓   | ✗ | ✗   | ✗ | ✗   |
| Course                                   | R, E | R    | R    | E   |   |     |   |     |
| Teaching mode(s)                         | D, S | D, S | D, G | D   |   |     |   |     |
| Assessment                               | SUM  | SUM  | FORM | SUM |   |     |   |     |
| <b>Teaching time (hours)</b>             | 0.25 | 4-6  | 0.5  | 1   | 0 | 2.5 | 0 | 0.2 |

**Total Teaching Time across All Topics.**

|                              | <b>University 1</b> | <b>University 2</b> | <b>University 3</b> | <b>University 4</b> | <b>University 5</b> | <b>University 6</b> | <b>University 7</b> | <b>University 8</b> |
|------------------------------|---------------------|---------------------|---------------------|---------------------|---------------------|---------------------|---------------------|---------------------|
| <b>Teaching Time (hours)</b> | 16.6                | 43-46.5*            | 19.75               | 42                  | 6.75                | 30.75               | 15.5                | 18.7                |

C = case discussions; D = didactic; E = elective; FORM = formative; G = small group activity; L = lab; PBL = problem-based learning; R = required; S = self-study; SUM = summative. † includes all therapeutic topics in curriculum; \* excludes self-directed learning time.

**Supplementary Table S3. Comparison of Scopes of Practice and Travel Medicine Curricula**

| Scope of Practice                                              | University<br>1 | University<br>2 | University<br>3 | University<br>4 | University<br>5 | University<br>6 | University<br>7 | University<br>8 |
|----------------------------------------------------------------|-----------------|-----------------|-----------------|-----------------|-----------------|-----------------|-----------------|-----------------|
| <b>Prescribing</b>                                             |                 |                 |                 |                 |                 |                 |                 |                 |
| Prescribe independently for any Schedule I drug                | No              | No              | Yes             | No              | No              | No              | No              | No              |
| Prescribe in a collaborative practice setting/agreement        | No              | Yes             | Yes             | No              | No              | No              | Yes             | No              |
| Malaria taught                                                 | Yes             | No              | Yes             | Yes             | Yes             | Yes             | No              | Yes             |
| Travellers' diarrhea taught                                    | Yes             | Yes             | Yes             | Yes             | Yes             | Yes             | Yes             | Yes             |
| Altitude sickness taught                                       | Yes             | No              | Yes             | Yes             | No              | Yes             | No              | Yes             |
| <b>Immunizations</b>                                           |                 |                 |                 |                 |                 |                 |                 |                 |
| Inject any drug or vaccine                                     | No              | No              | Yes             | Pending         | Yes             | Pending         | Yes             | Pending         |
| Inject vaccines only                                           | Yes             | Yes             | Yes             | Yes             | Yes             | Pending         | Yes             | Pending         |
| Inject influenza vaccine                                       | Yes             | Yes             | Yes             | Yes             | Yes             | Pending         | Yes             | Pending         |
| Percentage of routine vaccinations taught (includes influenza) | 88% (n = 7)     | 75% (n = 6)     | 88% (n = 7)     | 100% (n = 8)    | 75% (n = 6)     | 100% (n = 8)    | 88% (n = 7)     | 88% (n = 7)     |
| Percentage of non-travel recommended vaccinations taught       | 100% (n = 4)    | 100% (n = 4)    | 100% (n = 4)    | 100% (n = 4)    | 100% (n = 4)    | 100% (n = 4)    | 100% (n = 4)    | 100% (n = 4)    |
| Percentage of travel vaccines taught                           | 86% (n = 6)     | 13% (n = 1)     | 86% (n = 6)     | 100% (n = 7)    | 57% (n = 4)     | 86% (n = 6)     | 0% (n = 0)      | 86% (n = 6)     |
